# Supplementary material for: Tunable pore size in diopside glass-ceramics with silver nanoparticles
Source: Royal Society of Chemistry journal article supplement (doi:10.1039/d0ce00019a), 2020-01-01
Supplement: d0ce00019a1.pdf [file d0ce00019a1.pdf]

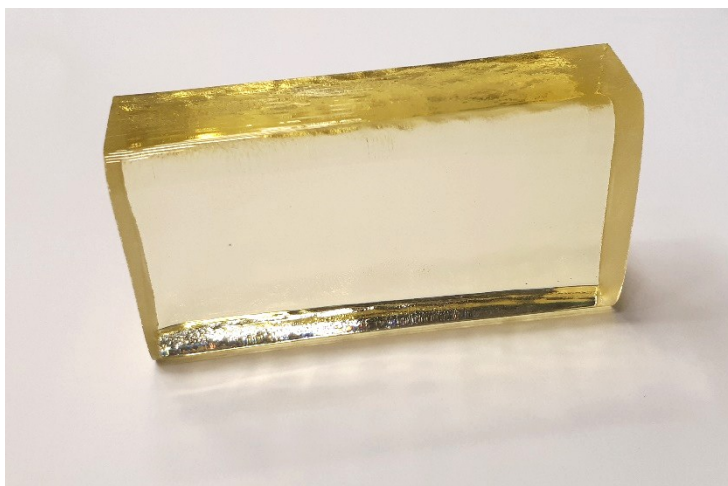

Figure S1: Photograph of glass B (glass A looks almost identical).

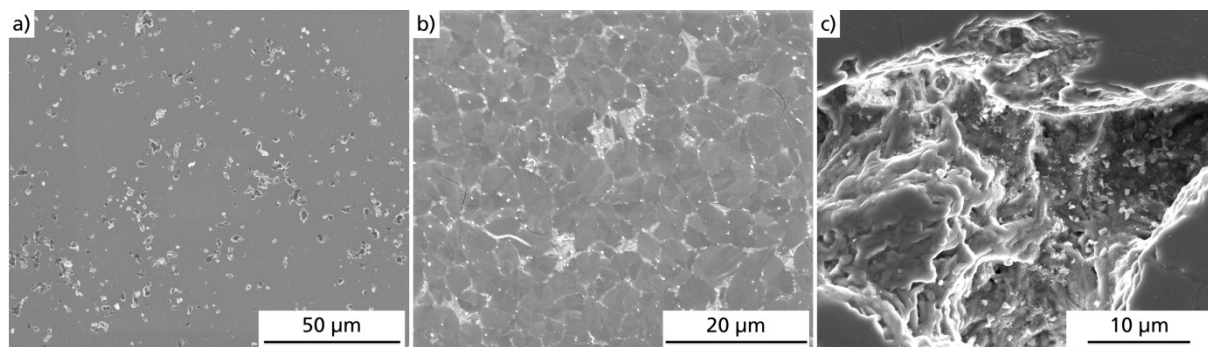

Figure S2: SEM micrographs of glass B (detection of secondary electrons). a) Overview after a heat treatment at 750 °C for 20 h and 875 °C for 5 h. b) Visualization of the crystals. c) Inner part of a pore.

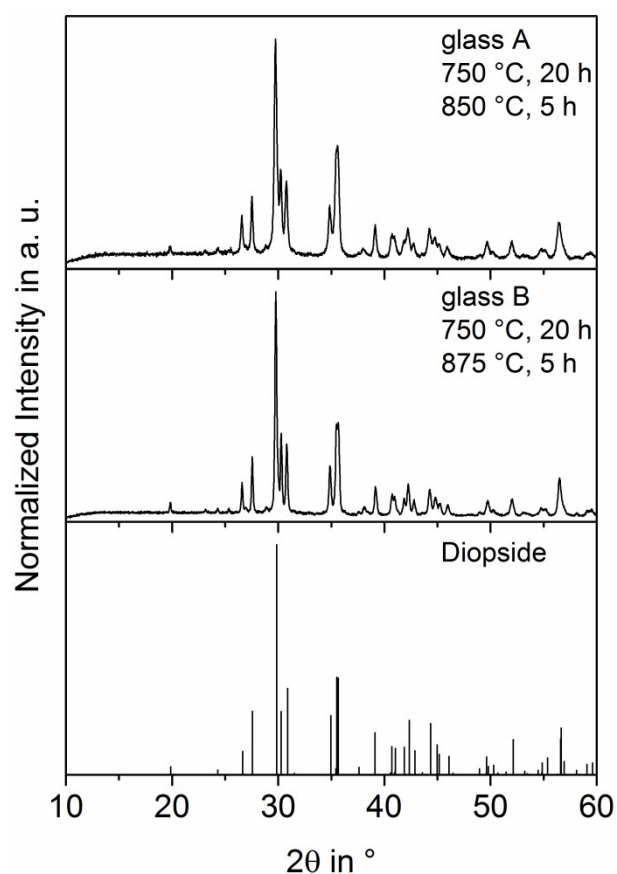

Figure S3: XRD patterns of glass A heat treated at 750 °C for 20 h and 850 °C for 5 h and glass B heat treated at 750 °C for 20 h and 875 °C for 5 h. The heat treatments were performed using bulk samples. Those samples were crushed and milled before the XRD measurement. In the lower part, the theoretical peak positions of Diopside are shown.
